# Supplementary material
Source: PubMed Central journal article supplement (PMC5519288)
Supplement: NIHMS880699-supplement-3.pdf [file NIHMS880699-supplement-3.pdf]

**Supplemental Table S2, Gene Ontology list of terms enriched or depleted by AAV-Sox11 versus AAV-Control in RGCs, related to Figure 3**

List of significantly enriched Gene Ontology terms in the Biological Process category. Specifically, this list shows enrichment of terms at the extremes of either up- or down-regulated genes.

| rank | GO biological process complete                       | gene set size | genes "up" in sox11 | genes "down" in sox11 | fold enrichment "up" in sox11 | fold enrichment "down" in sox11 | p-value "up" in sox11 | p-value "down" in sox11 | sum of enrichment "up" and "down" |
|------|------------------------------------------------------|---------------|---------------------|-----------------------|-------------------------------|---------------------------------|-----------------------|-------------------------|-----------------------------------|
| 1    | synaptic transmission, glutamatergic                 | 30            |                     | 10                    |                               |                                 | -9.6                  | 0.001210                | 9.6                               |
| 2    | ceramide biosynthetic process                        | 46            | 8                   |                       | 8.57                          |                                 | 0.046700              |                         | 8.57                              |
| 3    | excitatory postsynaptic potential                    | 35            |                     | 9                     |                               |                                 | -7.41                 | 0.040600                | 7.41                              |
| 4    | chemical synaptic transmission, postsynaptic         | 43            |                     | 11                    |                               |                                 | -7.37                 | 0.003910                | 7.37                              |
| 5    | axonogenesis                                         | 305           | 24                  | 36                    | 3.88                          |                                 | -3.4                  | 0.000242                | 7.28                              |
| 6    | axon development                                     | 327           | 26                  | 38                    | 3.92                          |                                 | -3.35                 | 0.000052                | 7.27                              |
| 7    | eye photoreceptor cell differentiation               | 48            |                     | 12                    |                               |                                 | -7.2                  | 0.001520                | 7.2                               |
| 8    | neuron-neuron synaptic transmission                  | 69            |                     | 17                    |                               |                                 | -7.1                  | 0.000006                | 7.1                               |
| 9    | regulation of postsynaptic membrane potential        | 45            |                     | 11                    |                               |                                 | -7.04                 | 0.006060                | 7.04                              |
| 10   | cell morphogenesis involved in neuron differentiator | 369           | 26                  | 41                    | 3.47                          |                                 | -3.2                  | 0.000557                | 6.67                              |
| 11   | ceramide metabolic process                           | 74            | 10                  |                       | 6.66                          |                                 | 0.030100              |                         | 6.66                              |
| 12   | neuron projection morphogenesis                      | 400           | 28                  | 44                    | 3.45                          |                                 | -3.17                 | 0.000199                | 6.62                              |
| 13   | neuron projection development                        | 559           | 40                  | 56                    | 3.53                          |                                 | -2.89                 | 0.000000                | 6.42                              |
| 14   | regulation of synaptic transmission, glutamatergic   | 59            |                     | 13                    |                               |                                 | -6.35                 | 0.001970                | 6.35                              |
| 15   | cell morphogenesis involved in differentiation       | 530           | 37                  | 50                    | 3.44                          |                                 | -2.72                 | 0.000001                | 6.16                              |
| 16   | neuron development                                   | 728           | 44                  | 74                    | 2.98                          |                                 | -2.93                 | 0.000002                | 5.91                              |
| 17   | neuron differentiation                               | 902           | 55                  | 88                    | 3                             |                                 | -2.81                 | 0.000000                | 5.81                              |
| 18   | photoreceptor cell differentiation                   | 60            |                     | 12                    |                               |                                 | -5.76                 | 0.015200                | 5.76                              |
| 19   | cell-cell adhesion via plasma-membrane adhesion n    | 135           | 15                  |                       | 5.48                          |                                 | 0.001460              |                         | 5.48                              |
| 20   | regulation of neuron projection development          | 480           | 27                  | 39                    | 2.77                          |                                 | -2.34                 | 0.022800                | 5.11                              |
| 21   | cell projection morphogenesis                        | 615           | 31                  | 51                    | 2.48                          |                                 | -2.39                 | 0.038400                | 4.87                              |
| 22   | generation of neurons                                | 1423          | 70                  | 118                   | 2.42                          |                                 | -2.39                 | 0.000000                | 4.81                              |
| 23   | cell projection organization                         | 932           | 50                  | 70                    | 2.64                          |                                 | -2.16                 | 0.000006                | 4.8                               |
| 24   | neurogenesis                                         | 1519          | 72                  | 129                   | 2.34                          |                                 | -2.45                 | 0.000000                | 4.79                              |
| 25   | cell morphogenesis                                   | 857           | 46                  | 63                    | 2.64                          |                                 | -2.12                 | 0.000028                | 4.76                              |
| 26   | action potential                                     | 91            |                     | 15                    |                               |                                 | -4.75                 | 0.009040                | 4.75                              |
| 27   | regulation of synapse assembly                       | 86            |                     | 14                    |                               |                                 | -4.69                 | 0.023500                | 4.69                              |
| 28   | synapse organization                                 | 137           |                     | 22                    |                               |                                 | -4.63                 | 0.000050                | 4.63                              |
| 29   | locomotion                                           | 982           | 43                  | 84                    | 2.16                          |                                 | -2.46                 | 0.021000                | 4.62                              |
| 30   | cellular component morphogenesis                     | 937           | 46                  | 66                    | 2.42                          |                                 | -2.03                 | 0.000388                | 4.45                              |
| 31   | cell development                                     | 1543          | 73                  | 113                   | 2.33                          |                                 | -2.11                 | 0.000000                | 4.44                              |
| 32   | adult behavior                                       | 165           |                     | 25                    |                               |                                 | -4.36                 | 0.000015                | 4.36                              |
| 33   | neuromuscular process                                | 120           |                     | 18                    |                               |                                 | -4.32                 | 0.003080                | 4.32                              |
| 34   | nervous system development                           | 1963          | 78                  | 156                   | 1.96                          |                                 | -2.29                 | 0.000075                | 4.25                              |
| 35   | axon guidance                                        | 181           |                     | 25                    |                               |                                 | -3.98                 | 0.000090                | 3.98                              |
| 36   | regulation of synapse organization                   | 123           |                     | 17                    |                               |                                 | -3.98                 | 0.019000                | 3.98                              |
| 37   | neuron projection guidance                           | 183           |                     | 25                    |                               |                                 | -3.93                 | 0.000111                | 3.93                              |
| 38   | hindbrain development                                | 140           |                     | 19                    |                               |                                 | -3.91                 | 0.006460                | 3.91                              |
| 39   | gliogenesis                                          | 187           |                     | 25                    |                               |                                 | -3.85                 | 0.000167                | 3.85                              |
| 40   | regulation of transport                              | 1731          | 67                  | 105                   | 1.91                          |                                 | -1.75                 | 0.002530                | 3.66                              |
| 41   | anatomical structure morphogenesis                   | 2100          | 75                  | 132                   | 1.76                          |                                 | -1.81                 | 0.009710                | 3.57                              |
| 42   | regulation of localization                           | 2409          | 91                  | 141                   | 1.86                          |                                 | -1.69                 | 0.000039                | 3.55                              |
| 43   | positive regulation of neuron projection developmen  | 281           | 20                  |                       | 3.51                          |                                 | 0.015600              |                         | 3.51                              |
| 44   | cell differentiation                                 | 3299          | 117                 | 193                   | 1.75                          |                                 | -1.69                 | 0.000005                | 3.44                              |
| 45   | regulation of synapse structure or activity          | 268           |                     | 32                    |                               |                                 | -3.44                 | 0.000027                | 3.44                              |
| 46   | regulation of cellular component organization        | 2248          | 86                  | 118                   | 1.89                          |                                 | -1.51                 | 0.000064                | 3.4                               |
| 47   | system development                                   | 3775          | 129                 | 221                   | 1.68                          |                                 | -1.69                 | 0.000005                | 3.37                              |
| 48   | regulation of membrane potential                     | 364           |                     | 42                    |                               |                                 | -3.32                 | 0.000000                | 3.32                              |
| 49   | regulation of multicellular organismal process       | 2623          | 86                  | 154                   | 1.62                          |                                 | -1.69                 | 0.043300                | 3.31                              |
| 50   | cellular developmental process                       | 3503          | 118                 | 197                   | 1.66                          |                                 | -1.62                 | 0.000087                | 3.28                              |
| 51   | anterograde trans-synaptic signaling                 | 346           |                     | 39                    |                               |                                 | -3.25                 | 0.000003                | 3.25                              |
| 52   | chemical synaptic transmission                       | 346           |                     | 39                    |                               |                                 | -3.25                 | 0.000003                | 3.25                              |
| 53   | synaptic signaling                                   | 346           |                     | 39                    |                               |                                 | -3.25                 | 0.000003                | 3.25                              |
| 54   | trans-synaptic signaling                             | 346           |                     | 39                    |                               |                                 | -3.25                 | 0.000003                | 3.25                              |
| 55   | multicellular organism development                   | 4344          | 141                 | 244                   | 1.6                           |                                 | -1.62                 | 0.000019                | 3.22                              |
| 56   | single-multicellular organism process                | 4999          | 158                 | 280                   | 1.56                          |                                 | -1.61                 | 0.000008                | 3.17                              |
| 57   | positive regulation of cell projection organization  | 359           | 23                  |                       | 3.16                          |                                 | 0.015500              |                         | 3.16                              |
| 58   | animal organ development                             | 2740          | 89                  | 144                   | 1.6                           |                                 | -1.51                 | 0.041300                | 3.11                              |
| 59   | anatomical structure development                     | 4722          | 147                 | 258                   | 1.53                          |                                 | -1.57                 | 0.000119                | 3.1                               |
| 60   | muscle system process                                | 215           |                     | 23                    |                               |                                 | -3.08                 | 0.025800                | 3.08                              |
| 61   | learning or memory                                   | 244           |                     | 26                    |                               |                                 | -3.07                 | 0.006480                | 3.07                              |
| 62   | developmental process                                | 5031          | 153                 | 271                   | 1.5                           |                                 | -1.55                 | 0.000245                | 3.05                              |
| 63   | single-organism developmental process                | 4987          | 152                 | 269                   | 1.5                           |                                 | -1.55                 | 0.000242                | 3.05                              |
| 64   | regulation of calcium ion transport                  | 218           |                     | 23                    |                               |                                 | -3.04                 | 0.032200                | 3.04                              |
| 65   | single-organism behavior                             | 437           |                     | 46                    |                               |                                 | -3.03                 | 0.000001                | 3.03                              |
| 66   | cellular component organization                      | 4567          | 137                 | 223                   | 1.48                          |                                 | -1.41                 | 0.004380                | 2.89                              |
| 67   | positive regulation of cellular process              | 4442          | 134                 | 215                   | 1.49                          |                                 | -1.39                 | 0.004560                | 2.88                              |
| 68   | positive regulation of biological process            | 4892          | 149                 | 231                   | 1.5                           |                                 | -1.36                 | 0.000379                | 2.86                              |
| 69   | modulation of synaptic transmission                  | 322           |                     | 32                    |                               |                                 | -2.86                 | 0.001670                | 2.86                              |
| 70   | cellular component organization or biogenesis        | 4731          | 138                 | 228                   | 1.44                          |                                 | -1.39                 | 0.018900                | 2.83                              |
| 71   | inorganic ion transmembrane transport                | 356           |                     | 35                    |                               |                                 | -2.83                 | 0.000586                | 2.83                              |
| 72   | regulation of transmembrane transport                | 381           |                     | 37                    |                               |                                 | -2.8                  | 0.000338                | 2.8                               |
| 73   | inorganic cation transmembrane transport             | 312           |                     | 30                    |                               |                                 | -2.77                 | 0.007730                | 2.77                              |
| 74   | regulation of ion transmembrane transport            | 366           |                     | 35                    |                               |                                 | -2.75                 | 0.001120                | 2.75                              |

|     |                                                        |       |     |          |        |       |          |          |
|-----|--------------------------------------------------------|-------|-----|----------|--------|-------|----------|----------|
| 75  | chemotaxis                                             | 410   |     | 39       |        | -2.74 | 0.000250 | 2.74     |
| 76  | cognition                                              | 273   |     | 26       |        | -2.74 | 0.047300 | 2.74     |
| 77  | taxis                                                  | 412   |     | 39       |        | -2.73 | 0.000283 | 2.73     |
| 78  | behavior                                               | 604   |     | 57       |        | -2.72 | 0.000000 | 2.72     |
| 79  | ion transmembrane transport                            | 437   |     | 41       |        | -2.7  | 0.000161 | 2.7      |
| 80  | regulation of metal ion transport                      | 341   |     | 32       |        | -2.7  | 0.005670 | 2.7      |
| 81  | cation transmembrane transport                         | 329   |     | 30       |        | -2.63 | 0.021900 | 2.63     |
| 82  | single-organism cellular process                       | 10437 | 288 | 449      | 1.36   | -1.24 | 0.000000 | 2.6      |
| 83  | regulation of cell morphogenesis involved in differen  | 356   |     | 32       |        | -2.59 | 0.013900 | 2.59     |
| 84  | regulation of ion transport                            | 556   |     | 50       |        | -2.59 | 0.000018 | 2.59     |
| 85  | positive regulation of neuron differentiation          | 368   |     | 33       |        | -2.58 | 0.010100 | 2.58     |
| 86  | cell adhesion                                          | 1068  | 56  |          | 2.58   |       | 0.000001 | 2.58     |
| 87  | positive regulation of nervous system development      | 527   |     | 47       |        | -2.57 | 0.000069 | 2.57     |
| 88  | biological adhesion                                    | 1078  | 56  |          | 2.56   |       | 0.000002 | 2.56     |
| 89  | eye development                                        | 340   |     | 30       |        | -2.54 | 0.041300 | 2.54     |
| 90  | single-organism process                                | 11808 | 319 | 496      | 1.33   | -1.21 | 0.000000 | 2.54     |
| 91  | regulation of system process                           | 479   |     | 42       |        | -2.53 | 0.000671 | 2.53     |
| 92  | regulation of cell projection organization             | 611   | 31  |          | 2.5    |       | 0.033800 | 2.5      |
| 93  | metal ion transport                                    | 504   |     | 43       |        | -2.46 | 0.000984 | 2.46     |
| 94  | regulation of cellular process                         | 9927  | 252 | 406      | 1.25   | -1.18 | 0.009560 | 2.43     |
| 95  | biological regulation                                  | 10948 | 273 | 452      | 1.23   | -1.19 | 0.008280 | 2.42     |
| 96  | regulation of biological process                       | 10441 | 260 | 426      | 1.23   | -1.18 | 0.029300 | 2.41     |
| 97  | regulation of neuron differentiation                   | 635   |     | 53       |        | -2.4  | 0.000068 | 2.4      |
| 98  | cellular process                                       | 13385 | 335 | 540      | 1.23   | -1.16 | 0.000002 | 2.39     |
| 99  | cell-cell adhesion                                     | 718   | 34  |          | 2.33   |       | 0.049700 | 2.33     |
| 100 | cell migration                                         | 699   |     | 56       |        | -2.31 | 0.000102 | 2.31     |
| 101 | cell part morphogenesis                                | 637   |     | 51       |        | -2.31 | 0.000472 | 2.31     |
| 102 | movement of cell or subcellular component              | 1122  |     | 90       |        | -2.31 | 0.000000 | 2.31     |
| 103 | positive regulation of cellular component organizatio  | 1171  | 55  |          | 2.31   |       | 0.000076 | 2.31     |
| 104 | central nervous system development                     | 718   |     | 57       |        | -2.29 | 0.000103 | 2.29     |
| 105 | cell motility                                          | 785   |     | 62       |        | -2.27 | 0.000028 | 2.27     |
| 106 | localization of cell                                   | 785   |     | 62       |        | -2.27 | 0.000028 | 2.27     |
| 107 | positive regulation of cell development                | 561   |     | 44       |        | -2.26 | 0.006580 | 2.26     |
| 108 | regulation of nervous system development               | 869   |     | 68       |        | -2.25 | 0.000007 | 2.25     |
| 109 | brain development                                      | 544   |     | 42       |        | -2.22 | 0.017200 | 2.22     |
| 110 | ion transport                                          | 972   |     | 75       |        | -2.22 | 0.000002 | 2.22     |
| 111 | sensory organ development                              | 534   |     | 41       |        | -2.21 | 0.025900 | 2.21     |
| 112 | head development                                       | 588   |     | 45       |        | -2.2  | 0.009400 | 2.2      |
| 113 | transmembrane transport                                | 707   |     | 54       |        | -2.2  | 0.000850 | 2.2      |
| 114 | regulation of cell morphogenesis                       | 552   |     | 42       |        | -2.19 | 0.024500 | 2.19     |
| 115 | ion homeostasis                                        | 561   |     | 42       |        | -2.16 | 0.036100 | 2.16     |
| 116 | biological_process                                     | 20430 | 445 | 751      | 1.07   | -1.06 | 0.000008 | 2.13     |
| 117 | regulation of neurogenesis                             | 772   |     | 57       |        | -2.13 | 0.001120 | 2.13     |
| 118 | regulation of cell development                         | 945   |     | 69       |        | -2.1  | 0.000079 | 2.1      |
| 119 | cation transport                                       | 608   |     | 44       |        | -2.08 | 0.049600 | 2.08     |
| 120 | positive regulation of cell differentiation            | 926   |     | 66       |        | -2.05 | 0.000407 | 2.05     |
| 121 | intracellular signal transduction                      | 1209  | 50  |          | 2.04   |       | 0.015500 | 2.04     |
| 122 | chemical homeostasis                                   | 863   |     | 60       |        | -2    | 0.003780 | 2        |
| 123 | cell-cell signaling                                    | 753   |     | 52       |        | -1.99 | 0.026900 | 1.99     |
| 124 | protein phosphorylation                                | 728   |     | 50       |        | -1.98 | 0.047900 | 1.98     |
| 125 | positive regulation of catalytic activity              | 907   |     | 62       |        | -1.97 | 0.004230 | 1.97     |
| 126 | positive regulation of molecular function              | 1203  |     | 80       |        | -1.92 | 0.000273 | 1.92     |
| 127 | negative regulation of multicellular organismal proce  | 1059  |     | 69       |        | -1.88 | 0.005200 | 1.88     |
| 128 | positive regulation of multicellular organismal proces | 1514  |     | 99       |        | -1.88 | 0.000013 | 1.88     |
| 129 | positive regulation of developmental process           | 1279  |     | 83       |        | -1.87 | 0.000417 | 1.87     |
| 130 | regulation of cell differentiation                     | 1598  |     | 102      |        | -1.84 | 0.000024 | 1.84     |
| 131 | positive regulation of phosphate metabolic process     | 1006  |     | 64       |        | -1.83 | 0.028800 | 1.83     |
| 132 | positive regulation of phosphorus metabolic process    | 1006  |     | 64       |        | -1.83 | 0.028800 | 1.83     |
| 133 | response to external stimulus                          | 1531  |     | 94       |        | -1.77 | 0.000646 | 1.77     |
| 134 | regulation of multicellular organismal development     | 1752  |     | 106      |        | -1.74 | 0.000180 | 1.74     |
| 135 | cell surface receptor signaling pathway                | 1601  |     | 96       |        | -1.73 | 0.001350 | 1.73     |
| 136 | homeostatic process                                    | 1318  |     | 79       |        | -1.73 | 0.018700 | 1.73     |
| 137 | positive regulation of cell communication              | 1389  |     | 82       |        | -1.7  | 0.021000 | 1.7      |
| 138 | positive regulation of signaling                       | 1396  |     | 81       |        | -1.67 | 0.045500 | 1.67     |
| 139 | regulation of biological quality                       | 3167  |     | 182      |        | -1.66 | 0.000000 | 1.66     |
| 140 | regulation of developmental process                    | 2291  |     | 132      |        | -1.66 | 0.000048 | 1.66     |
| 141 | regulation of cell communication                       | 2642  |     | 146      |        | -1.59 | 0.000091 | 1.59     |
| 142 | localization                                           | 4296  |     | 234      |        | -1.57 | 0.000000 | 1.57     |
| 143 | regulation of molecular function                       | 2107  |     | 115      |        | -1.57 | 0.008100 | 1.57     |
| 144 | regulation of signaling                                | 2663  |     | 145      |        | -1.57 | 0.000259 | 1.57     |
| 145 | establishment of localization                          | 3398  |     | 177      |        | -1.5  | 0.000121 | 1.5      |
| 146 | transport                                              | 3253  |     | 169      |        | -1.5  | 0.000345 | 1.5      |
| 147 | negative regulation of biological process              | 4288  |     | 209      |        | -1.4  | 0.000732 | 1.4      |
| 148 | cell communication                                     | 4823  |     | 233      |        | -1.39 | 0.000185 | 1.39     |
| 149 | multicellular organismal process                       | 6664  |     | 317      |        | -1.37 | 0.000000 | 1.37     |
| 150 | negative regulation of cellular process                | 3969  |     | 189      |        | -1.37 | 0.018500 | 1.37     |
| 151 | signaling                                              | 4723  |     | 225      |        | -1.37 | 0.001150 | 1.37     |
| 152 | single organism signaling                              | 4719  |     | 225      |        | -1.37 | 0.001080 | 1.37     |
| 153 | Unclassified                                           | 1892  | 8   | 24       | 0.21   | -0.37 | 0.000000 | 0.58     |
| 154 | sensory perception of chemical stimulus                | 1212  | 1   | 10 < 0.2 |        | -0.24 | 0.000002 | 0.000013 |
| 155 | sensory perception of smell                            | 1111  | 1   | 5 < 0.2  | > -0.2 |       | 0.000018 | 0.000000 |
